# Supplementary material for: Targeting senescence induced by age or chemotherapy with a polyphenol-rich natural extract improves longevity and healthspan in mice
Source: PubMed Central journal article supplement (PMC11408255; doi:10.1038/s43587-024-00663-7), 2024-07-01

## Supplementary Table 4

### CHARACTERIZATION OF HAENKENIUM EXTRACT

Characterization was performed by UPLC-QTOF, after extracting the sample in methanol. A representative chromatogram is reported in Figure 5a, while the characterization results are shown in this Table.

| RT (min) | m/z      | Fragments (MS/MS)                   | Identification                     | Ion type                            | % w/w *     |
|----------|----------|-------------------------------------|------------------------------------|-------------------------------------|-------------|
| 9.2749   | 637.1194 | 285.0399 175.0387 151.0387          | Luteolin diglucuronide             | [M-H] <sup>-</sup>                  | 0.55        |
| 7.9191   | 315.0499 | 151.0288                            | Isorhamnetin                       | [M-H] <sup>-</sup>                  | 0.48        |
| 7.2652   | 401.1238 | 211.0828                            | Nobiletin                          | [M-H] <sup>-</sup>                  | 0.38        |
| 6.8429   | 461.0719 | 285.0396 151.0024 133.0283          | Luteolin glucuronide               | [M-H] <sup>-</sup>                  | 0.59        |
| 5.8229   | 593.1515 | 473.1082 383.0767 353.0662          | Elatin                             | [M-H] <sup>-</sup>                  | 0.32        |
| 8.6852   | 329.0661 | 314.0421 299.0188                   | 3,7-Dimethylquercetin              | [M-H] <sup>-</sup>                  | 0.21        |
| 8.7185   | 577.1924 | 285.0393                            | Prenyleriodictyol                  | [M-H] <sup>-</sup>                  | 0.21        |
| 8.4595   | 285.0397 | 175.0388 151.0027 133.0285 107.1270 | Luteolin                           | [M-H] <sup>-</sup>                  | 0.15        |
| 9.1078   | 591.1715 | 301.1163                            | Hesperetin 7-neohesperidoside      | [M-H <sub>2</sub> O-H] <sup>-</sup> | 0.11        |
| 8.0571   | 533.1647 | 371.1120                            | Phellatin                          | [M-H] <sup>-</sup>                  | 0.09        |
| 6.9794   | 463.0874 | 301.0336                            | Quercetin-glucoside (isoquercetin) | [M-H] <sup>-</sup>                  | 0.07        |
| 9.9239   | 299.0551 | 284.0316 256.0352                   | Diosmetin                          | [M-H] <sup>-</sup>                  | 0.05        |
| 9.2643   | 593.1502 | 285.0387                            | Luteolin-7-O-rutinoside            | [M-H] <sup>-</sup>                  | 0.04        |
| 5.5006   | 609.1447 | 301.0269                            | Rutin                              | [M-H] <sup>-</sup>                  | 0.02        |
| 9.2690   | 285.0399 | 255.0289 227.0346                   | Kaempferol                         | [M-H] <sup>-</sup>                  | 0.02        |
|          |          |                                     | <b>Total identified flavonoids</b> |                                     | <b>3.29</b> |
|          |          |                                     |                                    |                                     |             |
| 7.8315   | 403.1399 | 357.1332 163.0388 151.0389          | Pinosresinol #                     | [M+FA-H] <sup>-</sup>               | 7.29        |
| 7.3855   | 359.0767 | 197.0450 179.0343 161.0239          | Rosmarinic acid                    | [M-H] <sup>-</sup>                  | 4.92        |

|         |          |                                     |                                                                                         |                                     |              |
|---------|----------|-------------------------------------|-----------------------------------------------------------------------------------------|-------------------------------------|--------------|
| 7.3855  | 719.1615 | 359.0766 161.0236                   | Sagerinic acid                                                                          | [M-H] <sup>-</sup>                  | 2.58         |
| 8.0107  | 553.2286 | 521.2021 507.2228 465.1761 419.1968 | Ssioriside                                                                              | [M-H] <sup>-</sup>                  | 1.9          |
| 8.7593  | 515.1188 | 353.0874                            | Di-caffeoylquinic acid                                                                  | [M-H] <sup>-</sup>                  | 0.92         |
| 7.9846  | 627.2288 | 581.2233 401.1595 59.0123           | Lyoniresinol 9-glucoside <sup>#</sup>                                                   | [M+FA-H] <sup>-</sup>               | 0.58         |
| 8.5969  | 567.1147 | NA                                  | Chrysophanol 8-(6-galloylglucoside)                                                     | [M-H] <sup>-</sup>                  | 0.58         |
| 6.5666  | 717.1464 | 537.2167 519.0921 475.1023          | Salvianolic acid L                                                                      | [M-H] <sup>-</sup>                  | 0.64         |
| 8.3924  | 515.1184 | 179.0339                            | Dicaffeoylquinic acid                                                                   | [M-H <sub>2</sub> O-H] <sup>-</sup> | 0.92         |
| 6.7077  | 373.1285 | NA                                  | 8-Hydroxypinoresinol <sup>#</sup>                                                       | [M-H] <sup>-</sup>                  | 0.44         |
| 7.3945  | 161.0235 | 179.0338                            | Caffeic acid                                                                            | [M-H <sub>2</sub> O-H] <sup>-</sup> | 0.43         |
| 6.8777  | 555.1128 | 313.0718                            | Salvianolic acid K                                                                      | [M-H] <sup>-</sup>                  | 0.07         |
|         |          |                                     | <b>Total identified phenols and lignans <sup>#</sup></b>                                |                                     | <b>21.26</b> |
|         |          |                                     |                                                                                         |                                     |              |
| 5.6685  | 387.1651 | 225.0790 207.1017                   | beta-D-Glucopyranosyl-11-hydroxyjasmonic acid <sup>§</sup>                              | [M-H] <sup>-</sup>                  | 3.92         |
| 13.6175 | 571.2884 | 409.2351                            | Phosphatidylinositol <sup>§</sup>                                                       | [M-H] <sup>-</sup>                  | 0.19         |
| 15.8469 | 455.3522 | 437.3423 411.3579                   | Ursolic acid                                                                            | [M-H] <sup>-</sup>                  | 0.24         |
| 9.5309  | 347.1860 | 329.1734 317.1751                   | 2 $\alpha$ ,16-Dihydroxy-4 $\beta$ -carboxy-O- $\beta$ -D-glucopyranosyl-19-nor-totarol | [M-H] <sup>-</sup>                  | 0.13         |
| 13.9808 | 455.3528 | NA                                  | Oleanolic acid                                                                          | [M-H] <sup>-</sup>                  | 0.16         |
| 8.7593  | 389.1596 | NA                                  | Rosmic acid                                                                             | [M-H] <sup>-</sup>                  | 0.1          |
| 11.5745 | 331.1911 | 287.2020                            | Carnosic acid                                                                           | [M-H] <sup>-</sup>                  | 0.05         |
| 15.7777 | 471.3474 | 453.3380                            | Corosolic acid                                                                          | [M-H] <sup>-</sup>                  | 0.05         |
| 12.3086 | 487.3429 | NA                                  | Salvin A                                                                                | [M-H] <sup>-</sup>                  | 0.05         |
| 16.7308 | 730.5480 | 568.4941                            | Araliacerebroside <sup>§</sup>                                                          | [M-H] <sup>-</sup>                  | 0.07         |
| 16.0299 | 461.3632 | 415.1462 149.0967                   | beta-Tocopherol                                                                         | [M+FA-H] <sup>-</sup>               | 0.05         |
| 12.4451 | 471.3476 | NA                                  | Maslinic acid                                                                           | [M-H] <sup>-</sup>                  | 0.05         |
| 6.4211  | 369.0827 | 207.0285                            | 5-Hydroxy-6-methoxycoumarin 7-glucoside <sup>§</sup>                                    | [M-H] <sup>-</sup>                  | 0.02         |
|         |          |                                     | <b>Total identified terpenes and others <sup>§</sup></b>                                |                                     | <b>5.08</b>  |

\* Flavonoids amounts are expressed as rutin equivalents; phenols as chlorogenic acid equivalents; terpenes as oleanolic acid equivalents; glycerides and fatty acid derivatives as lecithin equivalents; coumarins as coumarin equivalents.

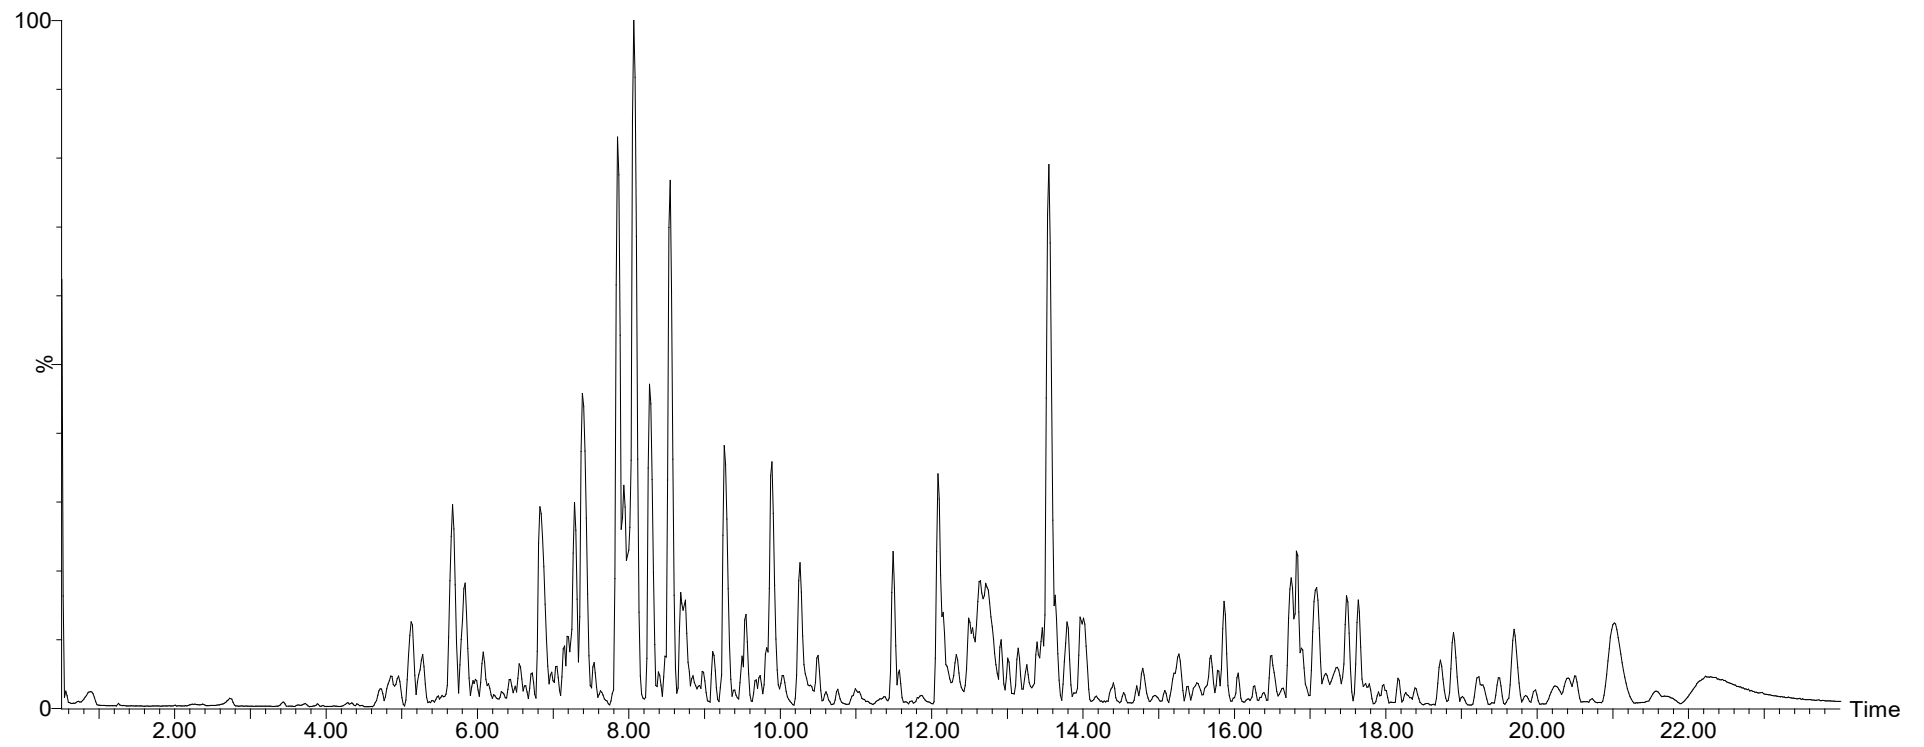

Supplement: 43587_2024_663_MOESM6_ESM.pdf [file 43587_2024_663_MOESM6_ESM.pdf]
