# Supplementary material for: Targeting senescence induced by age or chemotherapy with a polyphenol-rich natural extract improves longevity and healthspan in mice
Source: PubMed Central journal article supplement (PMC11408255; doi:10.1038/s43587-024-00663-7), 2024-07-01

Ponceau

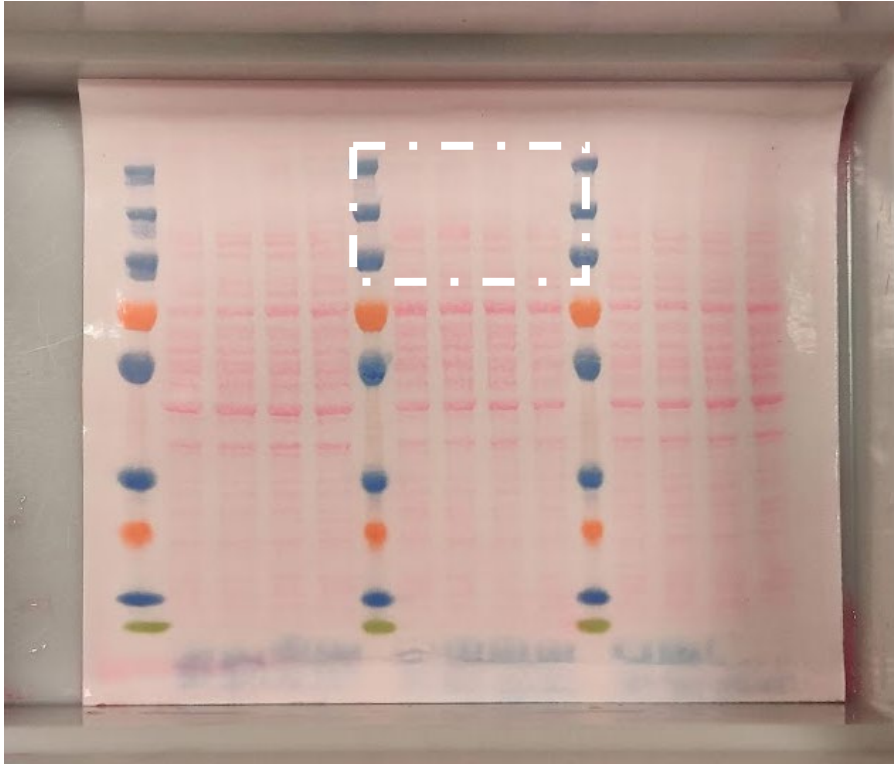

HSP90

115 kDa —

80 kDa —

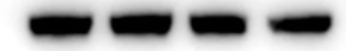

Ponceau

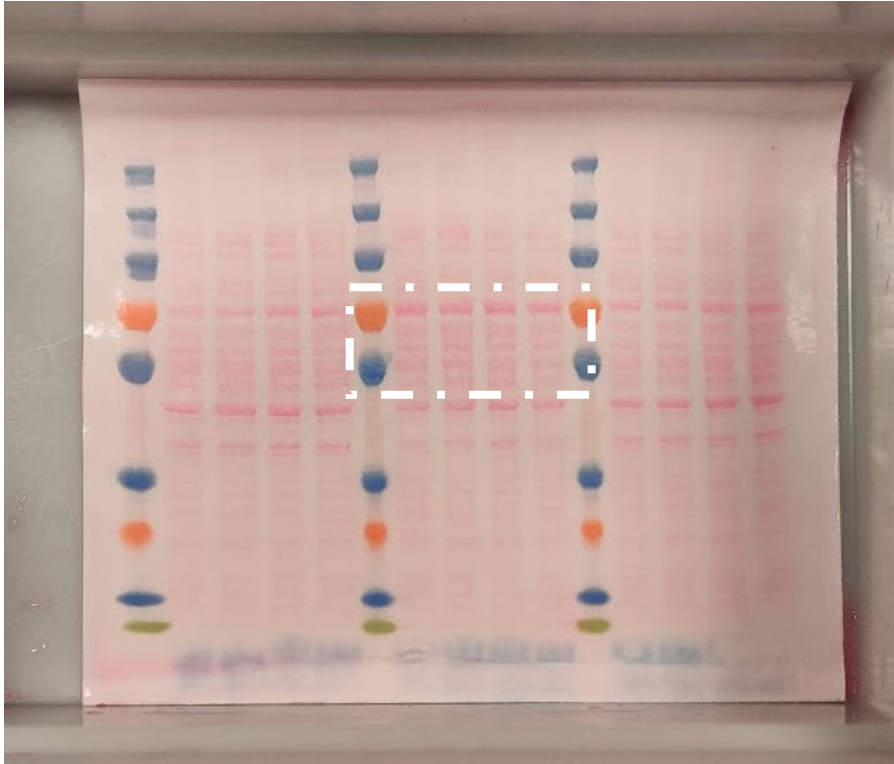

p53

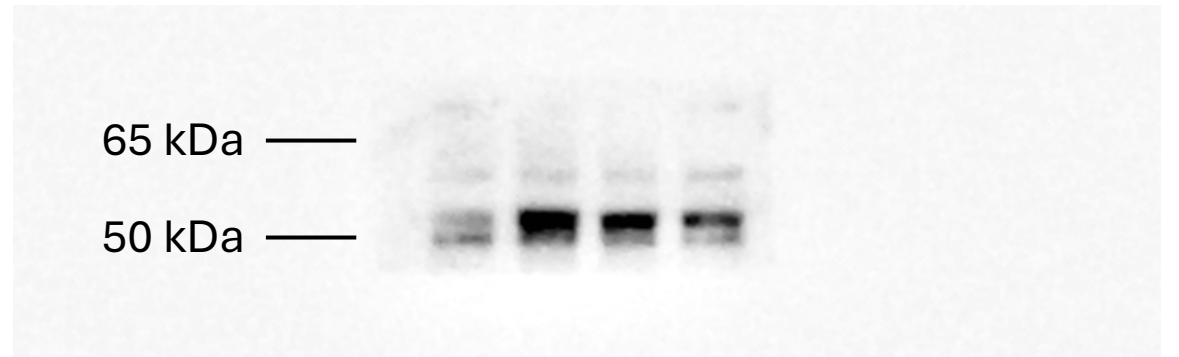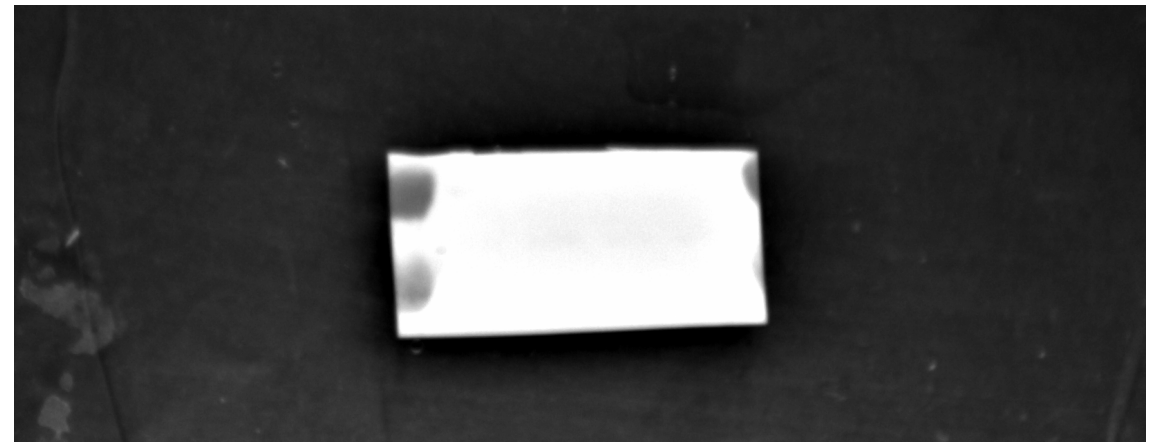

Ponceau

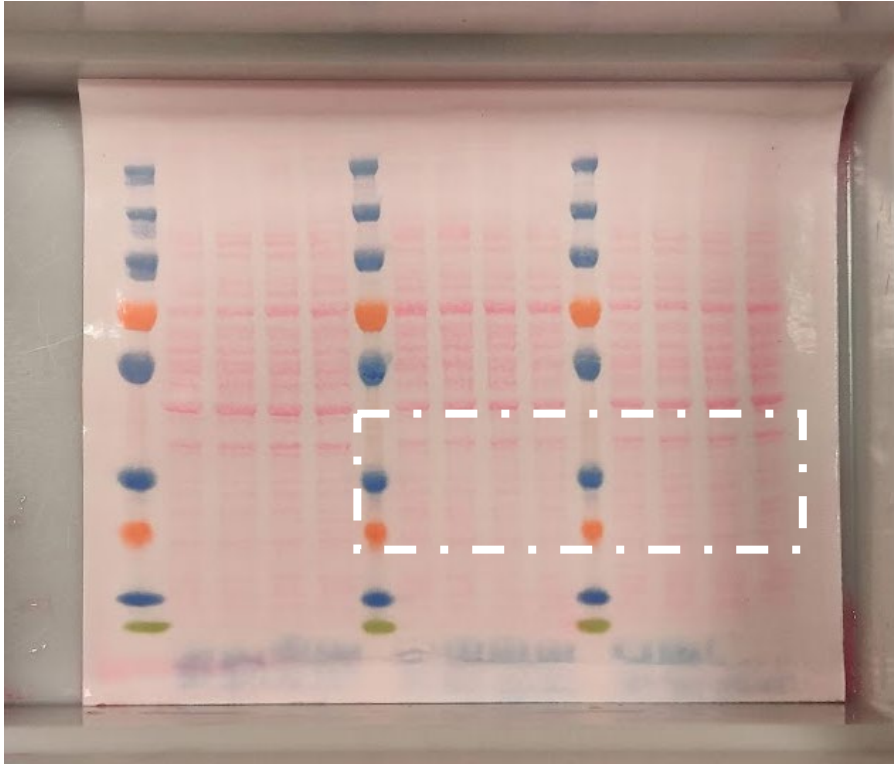

CDK4

30 kDa

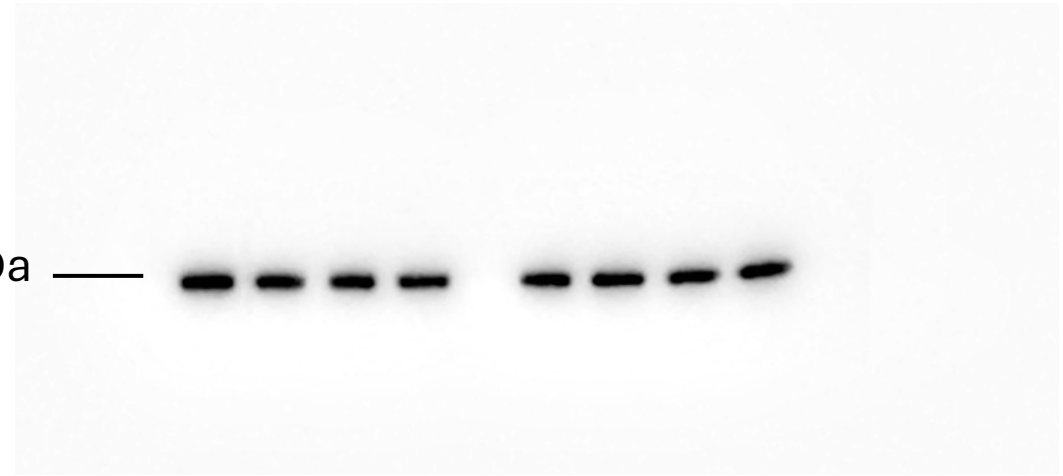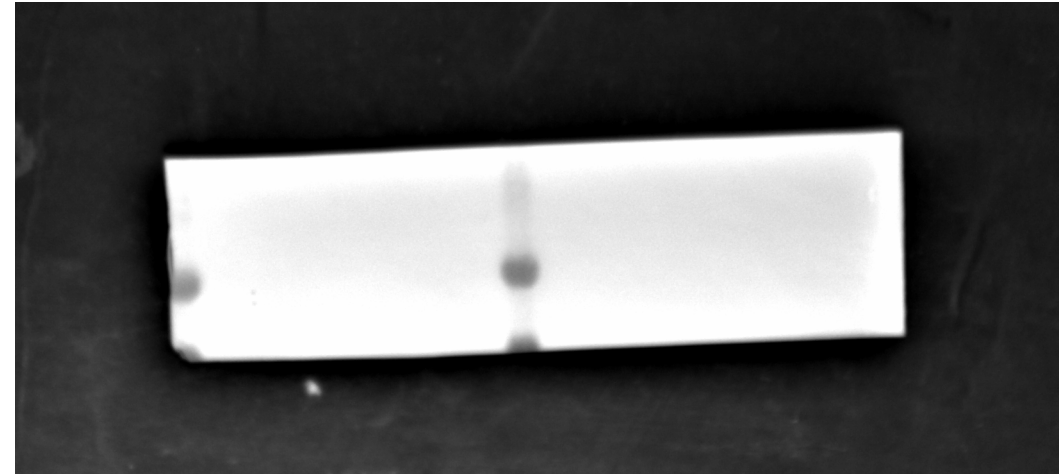

Ponceau

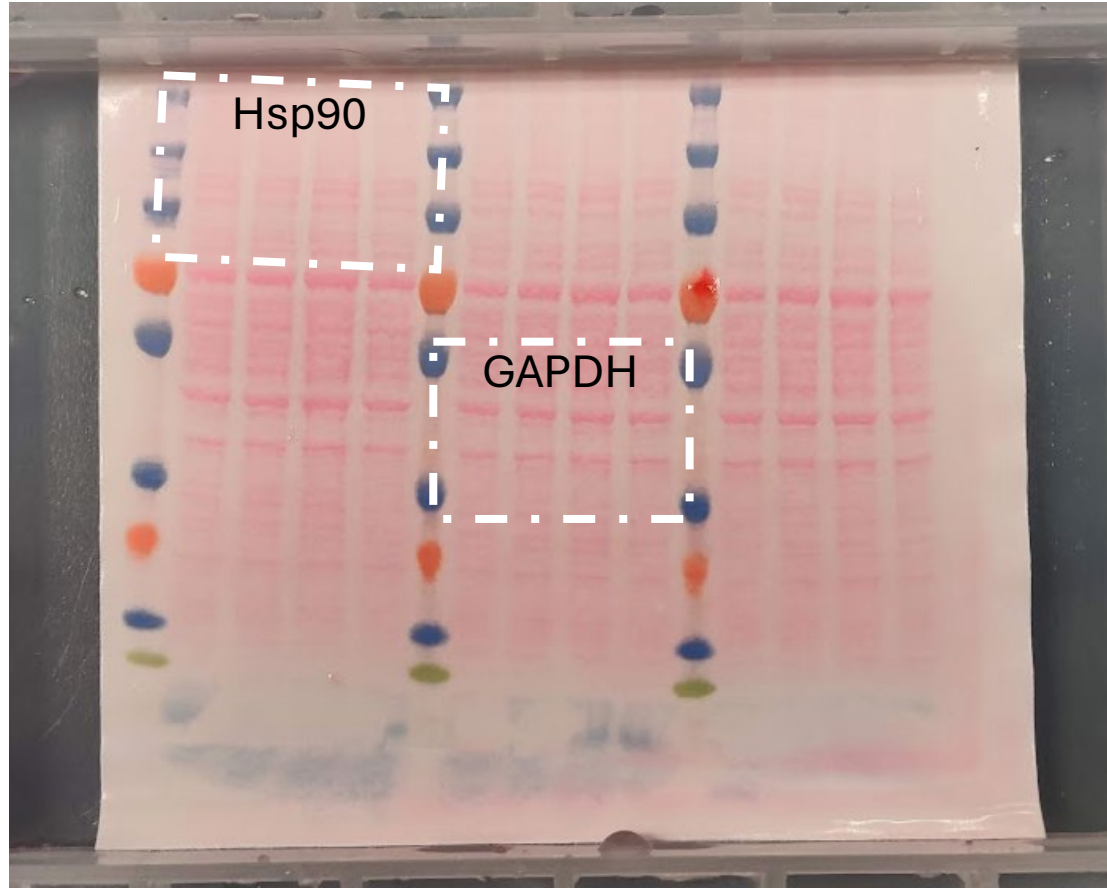

Hsp90

115 kDa —

80 kDa —

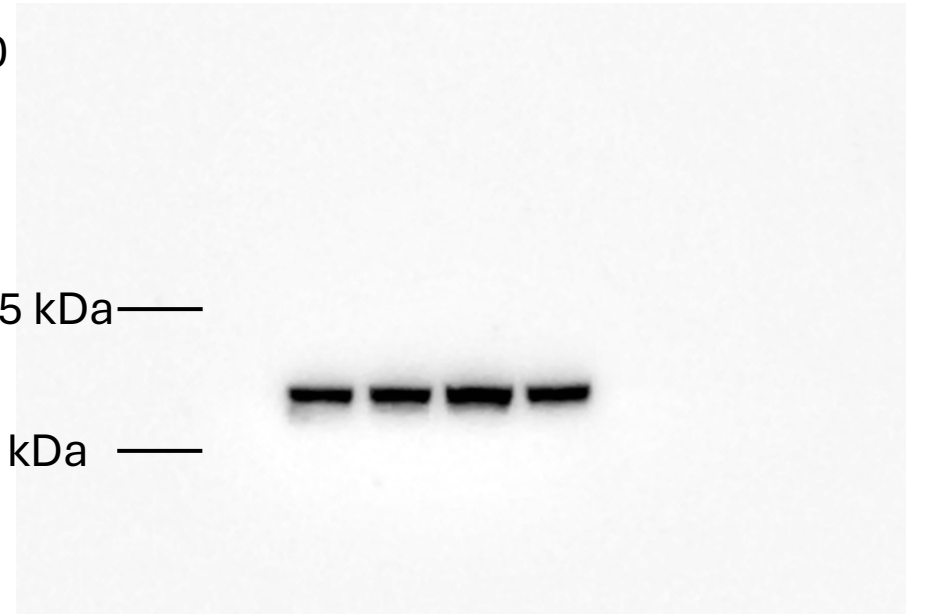

GAPDH

50 kDa —

30 kDa —

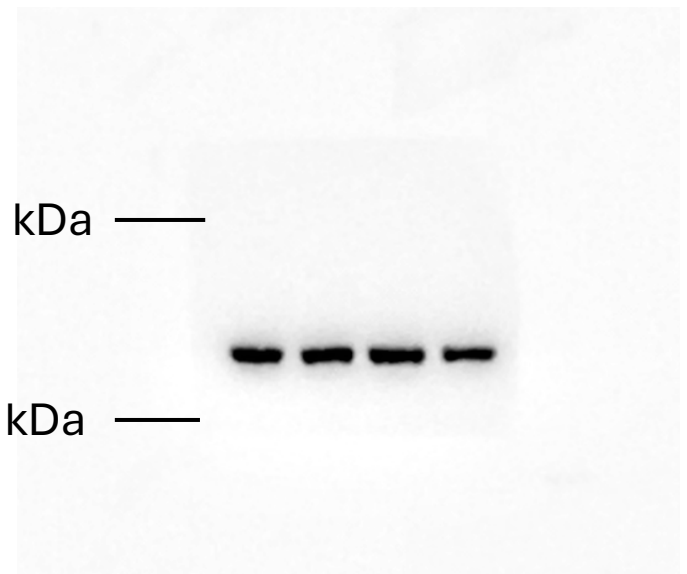

Ponceau

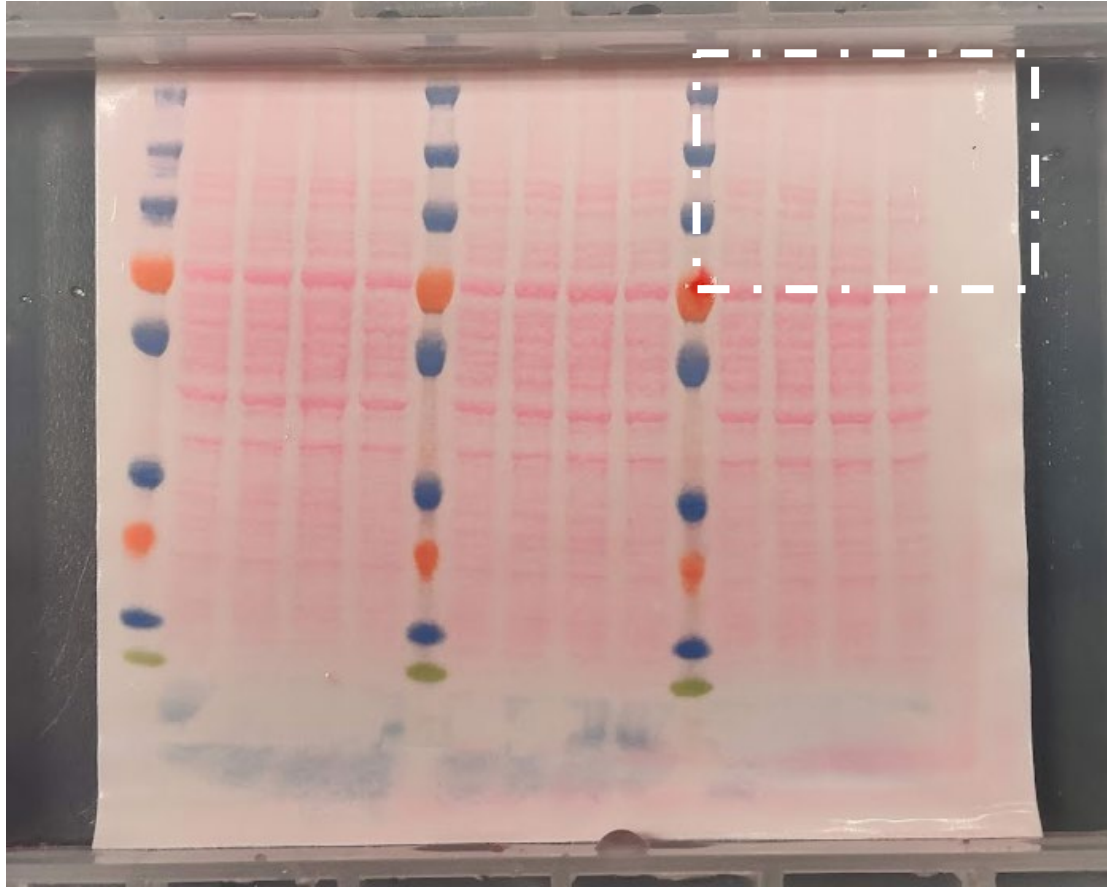

hsp90

115 kDa —

80 kDa —

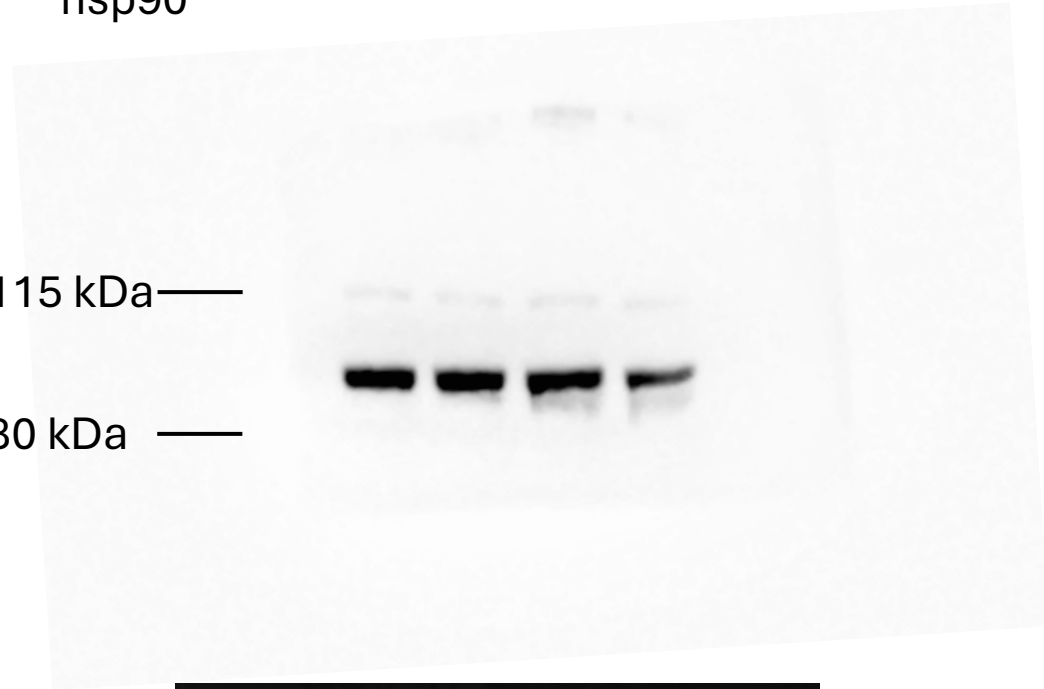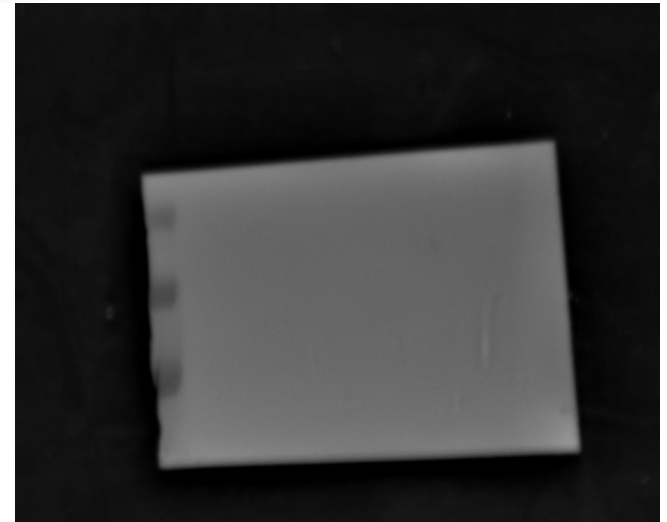

Ponceau

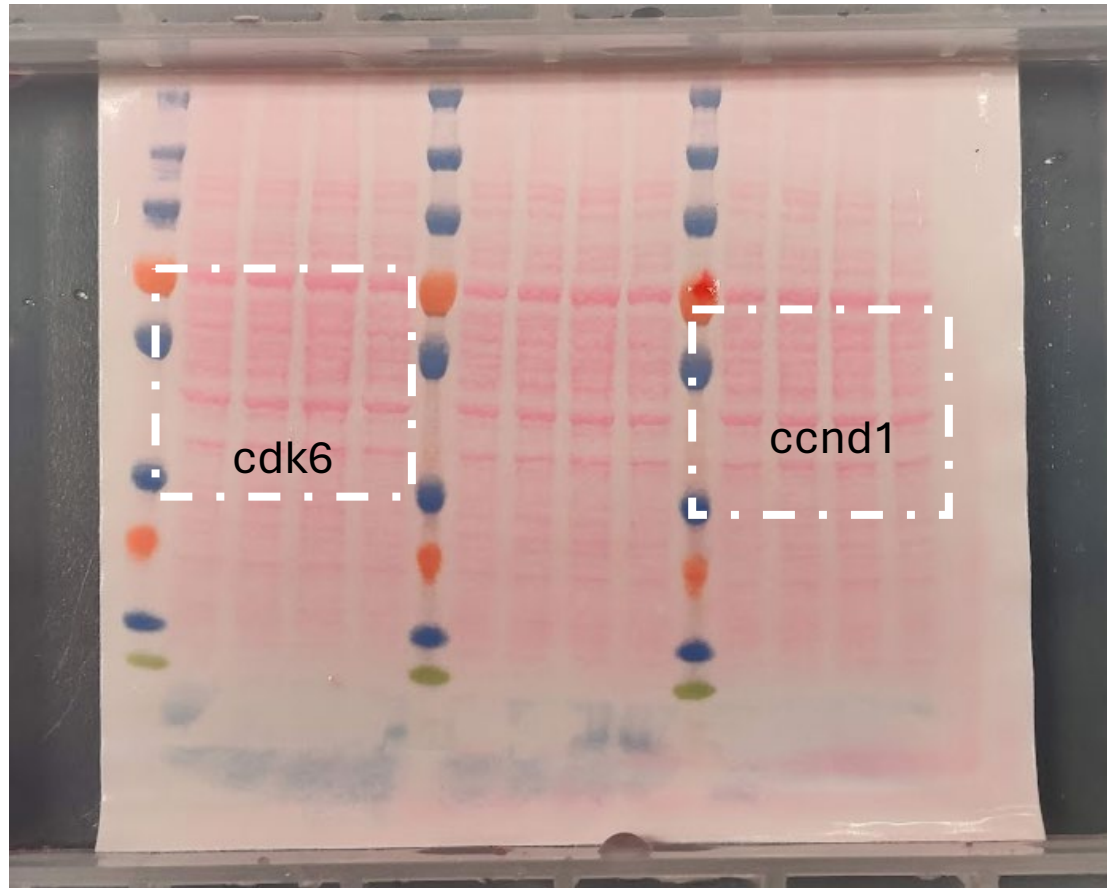

Cyclin D1

50 kDa —

30 kDa —

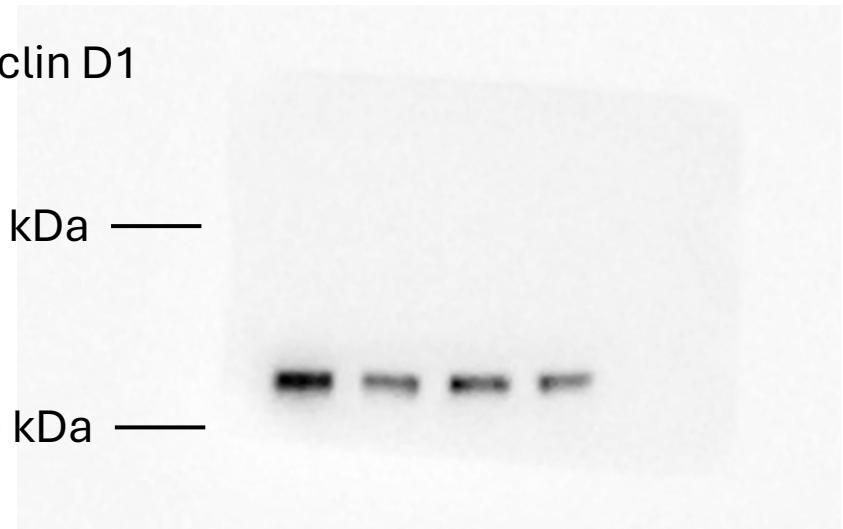

CDK6

65 kDa —

50 kDa —

30 kDa —

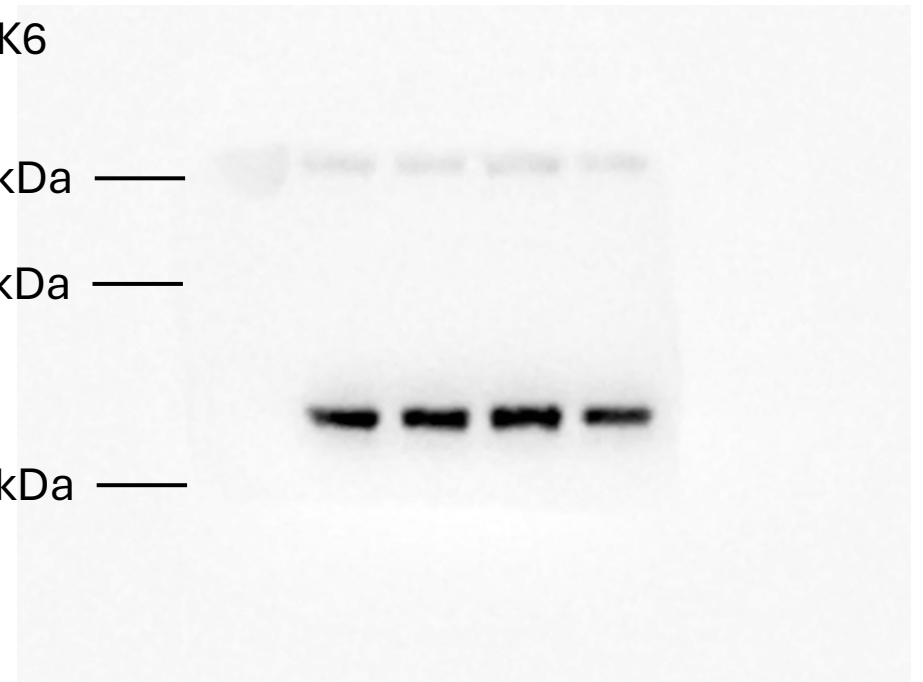

Ponceau

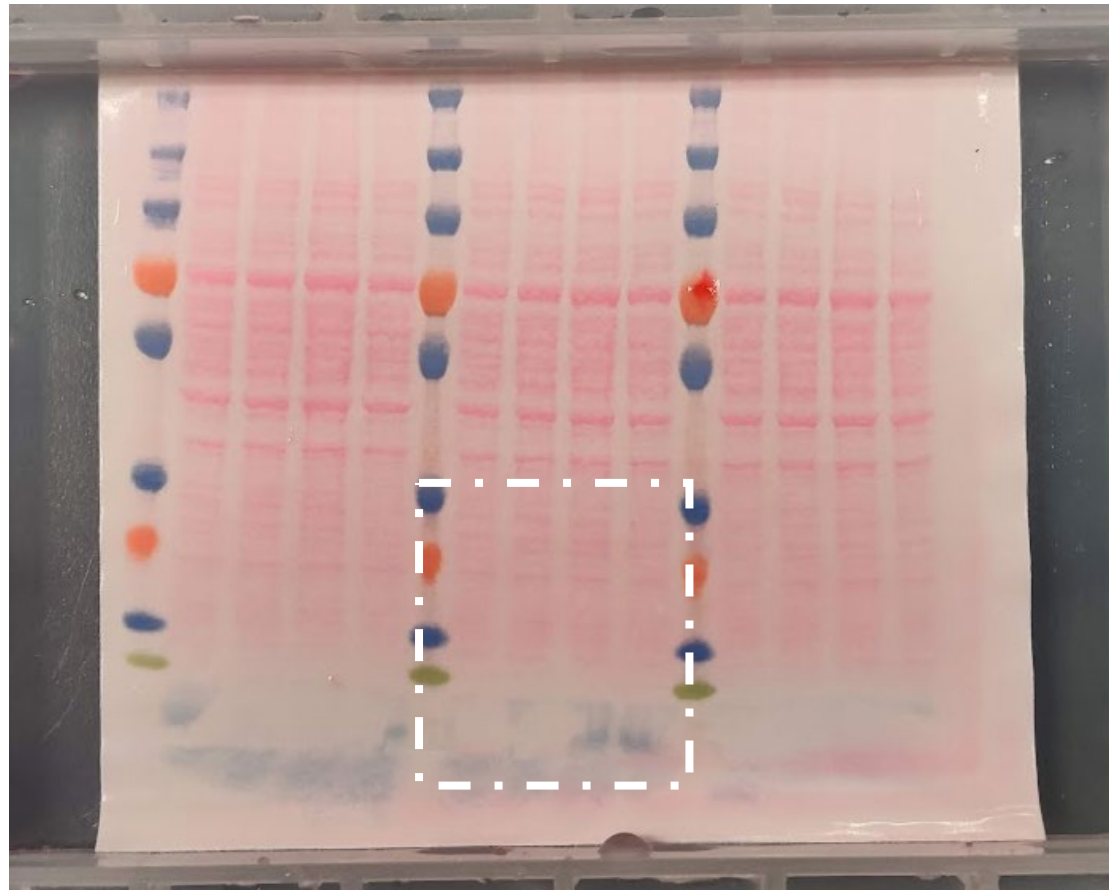

p21

25 kDa —

15 kDa —

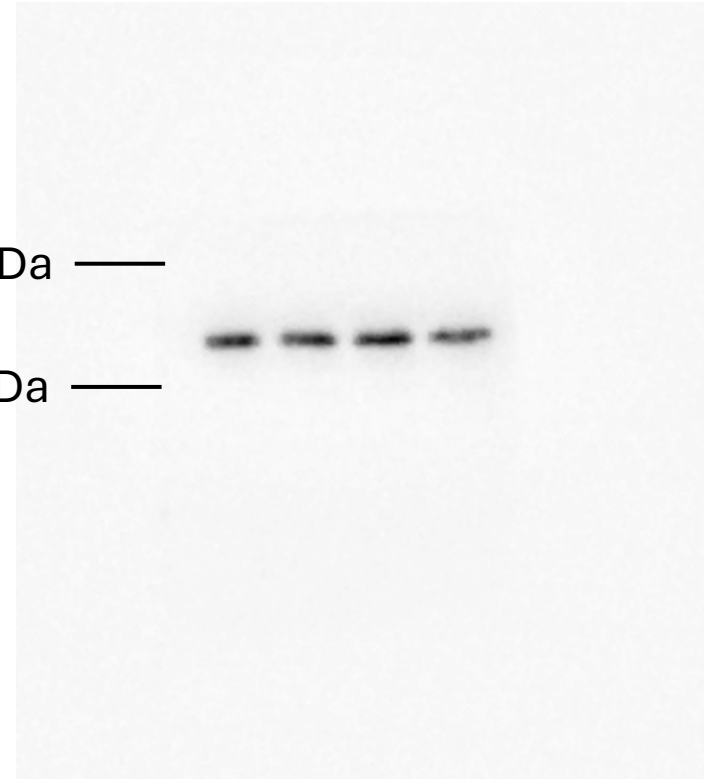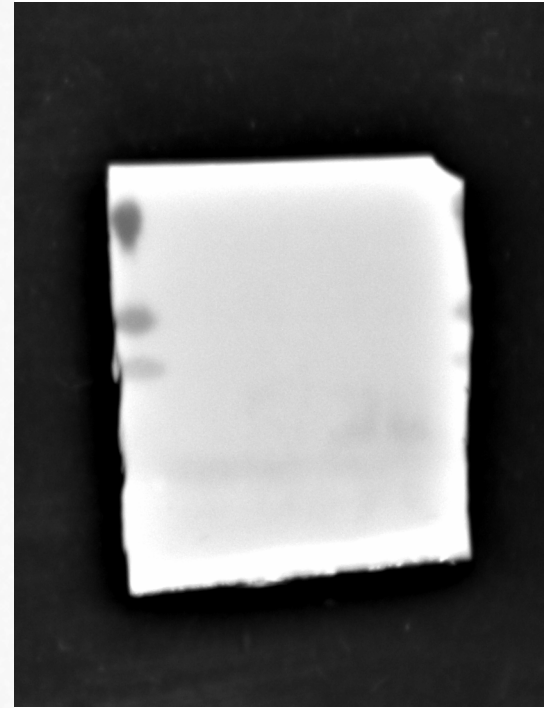

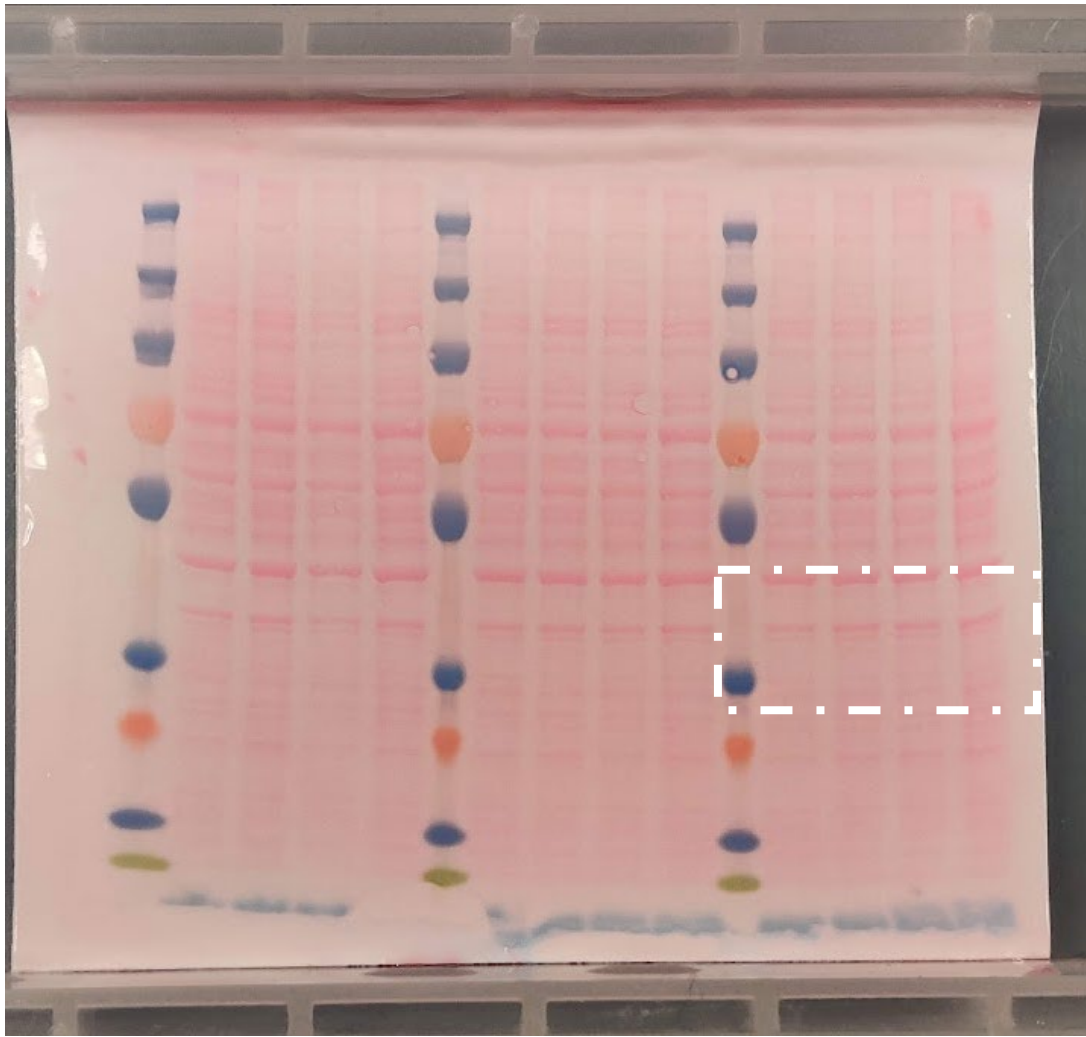

GAPDH

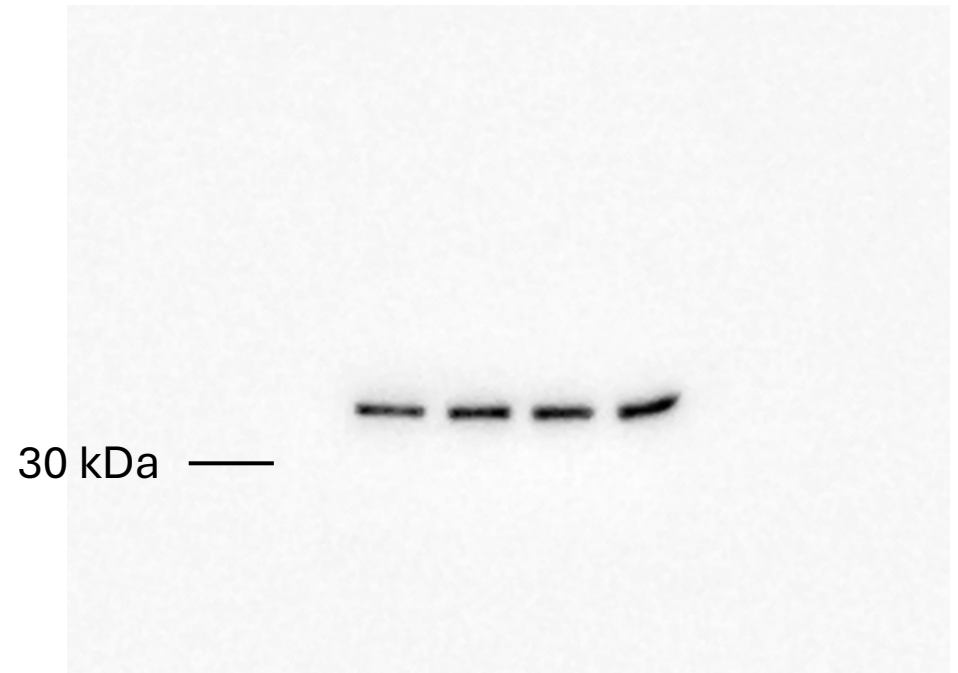



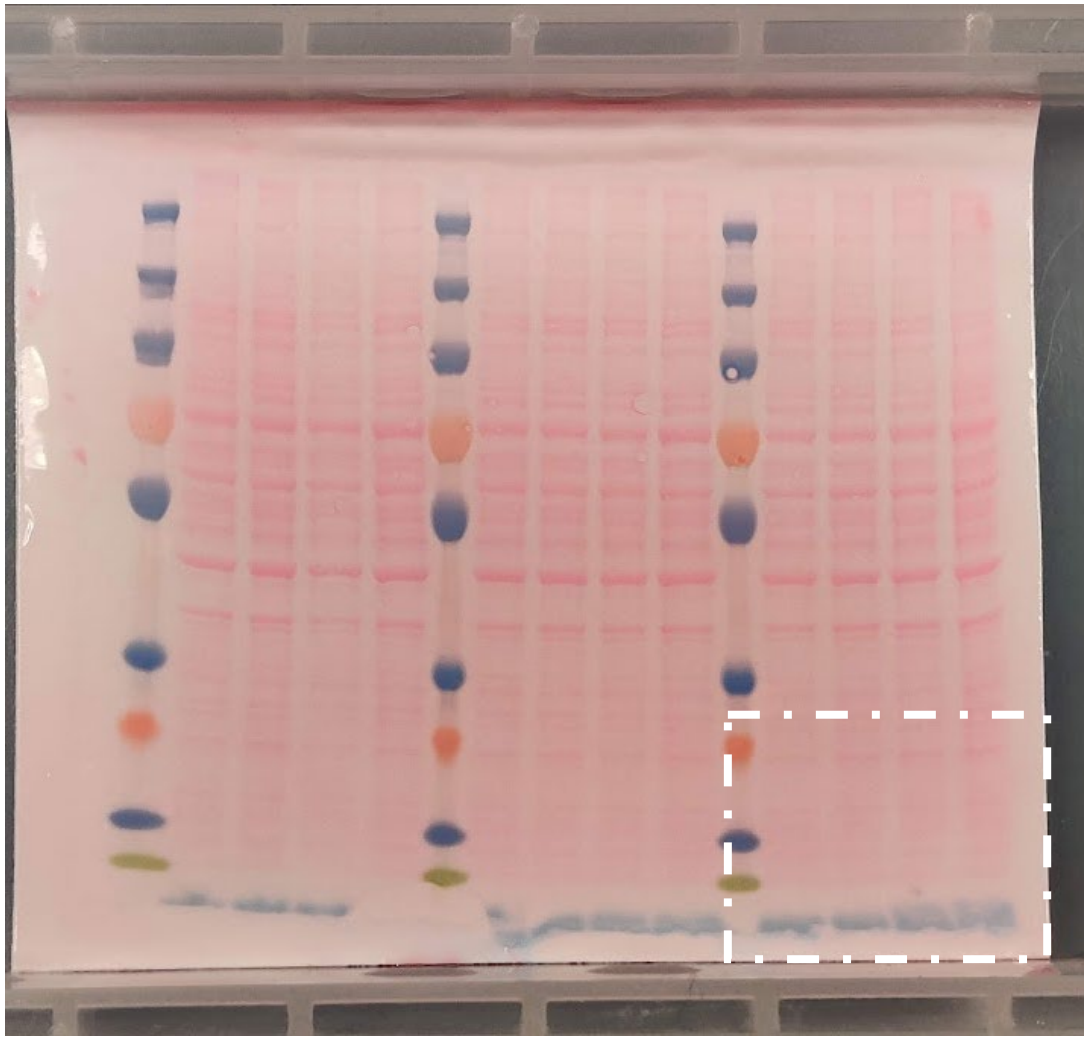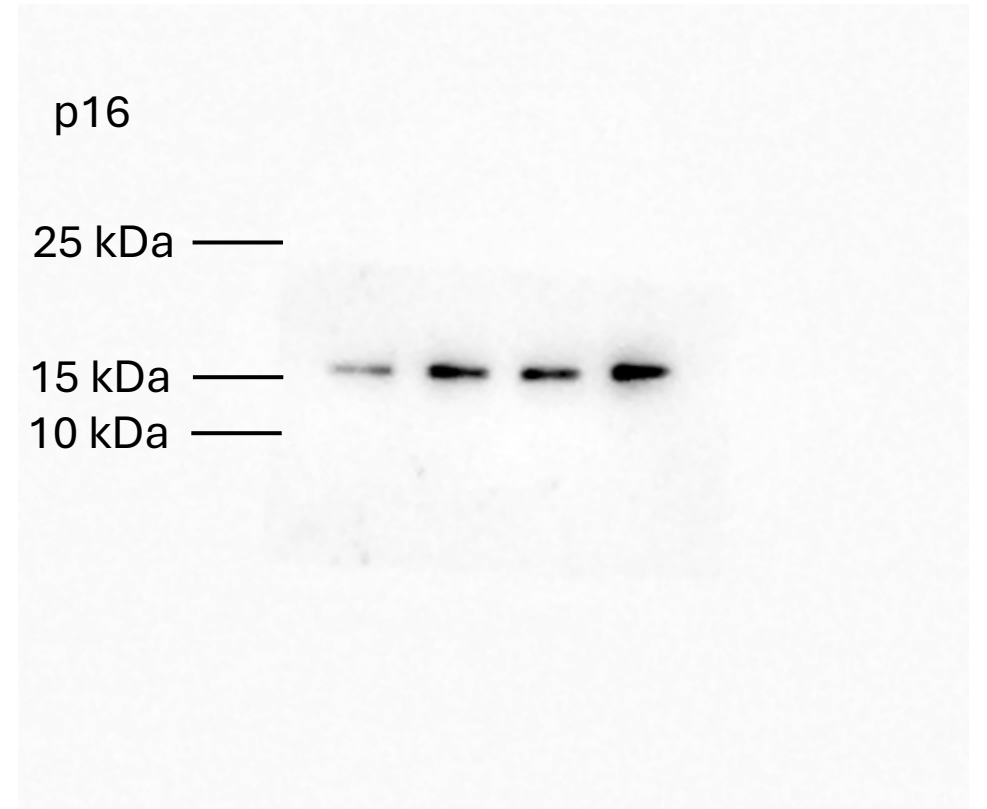

Supplement: 43587_2024_663_MOESM13_ESM.pdf [file 43587_2024_663_MOESM13_ESM.pdf]
