# Supplementary material for: Targeting senescence induced by age or chemotherapy with a polyphenol-rich natural extract improves longevity and healthspan in mice
Source: PubMed Central journal article supplement (PMC11408255; doi:10.1038/s43587-024-00663-7), 2024-07-01
Supplement: 43587_2024_663_MOESM3_ESM.pdf [file 43587_2024_663_MOESM3_ESM.pdf]

**Table S1** Cox proportional hazard ratios comparing HK-treated to UT mice in aging. Three models were calculated to determine the effect of facility and sex on the effects of treatment.

| <b>Model 1: Unadjusted</b>                                   |                 |                |                     |               |       |
|--------------------------------------------------------------|-----------------|----------------|---------------------|---------------|-------|
|                                                              |                 | <b>P value</b> | <b>Hazard Ratio</b> | <b>95% CL</b> |       |
| <b>Treatment</b>                                             | <b>HK vs UT</b> | 0.0064         | 0.54                | 0.347         | 0.841 |
| <b>Model 2: stratified by facility</b>                       |                 |                |                     |               |       |
| <b>Treatment</b>                                             | <b>HK vs UT</b> | 0.0115         | 0.559               | 0.356         | 0.878 |
| <b>Model 3: stratified by facility &amp; adjusted by sex</b> |                 |                |                     |               |       |
| <b>Treatment</b>                                             | <b>HK vs UT</b> | 0.0226         | 0.577               | 0.359         | 0.926 |
| <b>Sex</b>                                                   | <b>Female</b>   | 0.6525         | 0.898               | 0.561         | 1.437 |
