# Supplementary material for: Targeting senescence induced by age or chemotherapy with a polyphenol-rich natural extract improves longevity and healthspan in mice
Source: PubMed Central journal article supplement (PMC11408255; doi:10.1038/s43587-024-00663-7), 2024-07-01
Supplement: 43587_2024_663_MOESM7_ESM.pdf [file 43587_2024_663_MOESM7_ESM.pdf]

Supplementary Table 5 - List of primer sequences for q-RT-PCR analysis

| mRNA                        | Primer                                  |
|-----------------------------|-----------------------------------------|
| Mus musculus <i>Coll1a1</i> | Sense: 5'-GCTCCTCTTAGGGGCCACT-3'        |
|                             | Anti-sense: 5'-CCACGTCTCACCATTGGGG-3'   |
| Mus musculus <i>Col3a1</i>  | Sense: 5'-ACGTAGATGAATTGGGATGCAG-3'     |
|                             | Anti-sense: 5'-GGGTTGGGGCAGTCTAGTG-3'   |
| Mus musculus <i>Fnl</i>     | Sense: 5'-ATGTGGACCCCTCCTGATAGT-3'      |
|                             | Anti-sense: 5'-GCCCAGTGATTCAGCAAAGG-3'  |
| Mus musculus <i>Cdk1na</i>  | Sense: 5'-CCCCCAATCGCAAGGATTCTT-3'      |
|                             | Anti-sense: 5'-CTTGGTTCGGTGGGTCTGTC-3'  |
| Mus musculus <i>Tp53</i>    | Sense: 5'-CTCTCCCCCGCAAAGAAAAA-3'       |
|                             | Anti-sense: 5'-CGGAACATCTCGAAGCGTTTA-3' |
| Mus musculus <i>Gapdh</i>   | Sense: 5'-AGGTCCGGTGTGAACGGATTTG-3'     |
|                             | Anti-sense: 5'-TGTAGACCATGTAGTTGAGGT-3' |
|                             |                                         |
| Homo sapiens <i>CDK1NA</i>  | Sense: 5'-CACCTCACCTGCTCTGCTGC-3'       |
|                             | Anti-sense: 5'-GCTGGTCTGCCGCCGTTTT-3'   |
| Homo sapiens <i>RPL27</i>   | Sense: 5'-TGGTAGGGCCGGGTGGTTGC-3'       |
|                             | Anti-sense: 5'-ACTTTGCGGGGGTAGCGGTC-3'  |
| Homo sapiens <i>GAPDH</i>   | Sense: 5'-TGCACCACCAACTGCTTAGC-3'       |
|                             | Anti-sense: 5'-GGCATGGACTGTGGTCATGAG-3' |
