# Supplementary material for: Targeting senescence induced by age or chemotherapy with a polyphenol-rich natural extract improves longevity and healthspan in mice
Source: PubMed Central journal article supplement (PMC11408255; doi:10.1038/s43587-024-00663-7), 2024-07-01

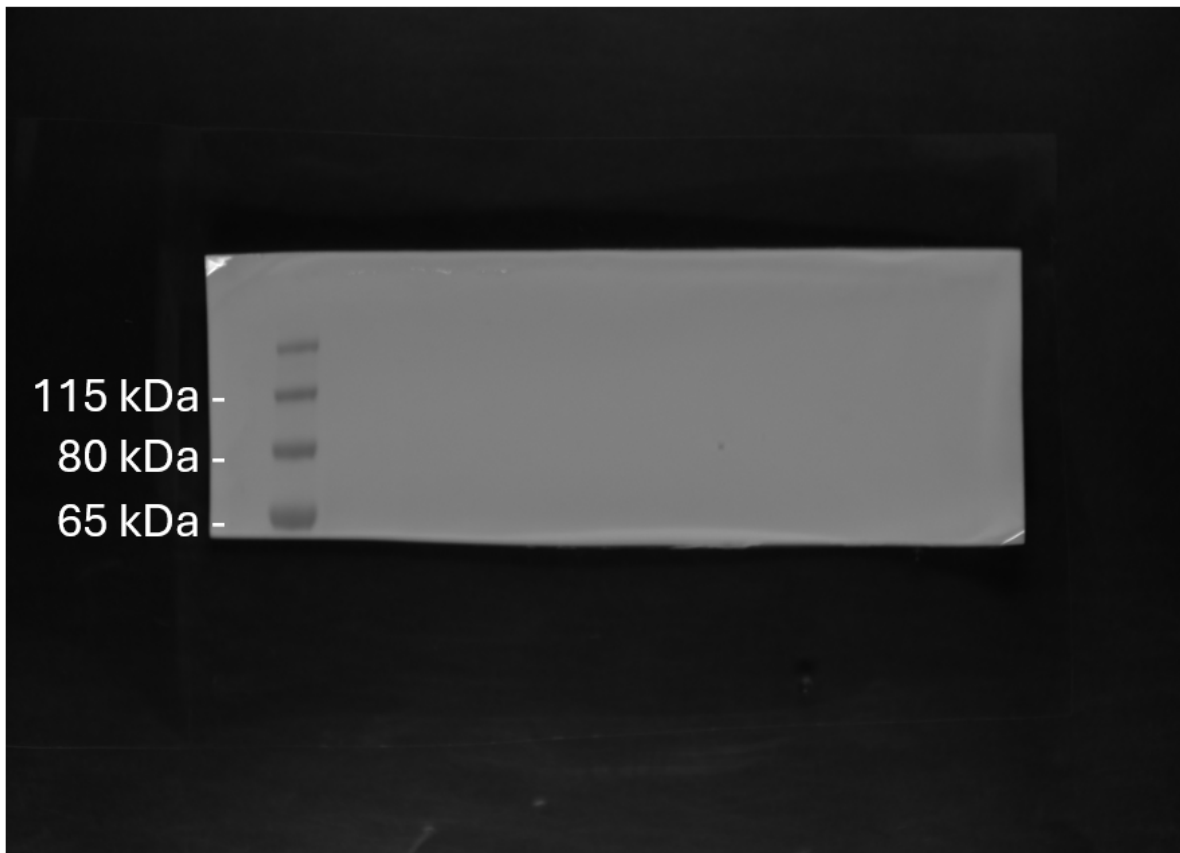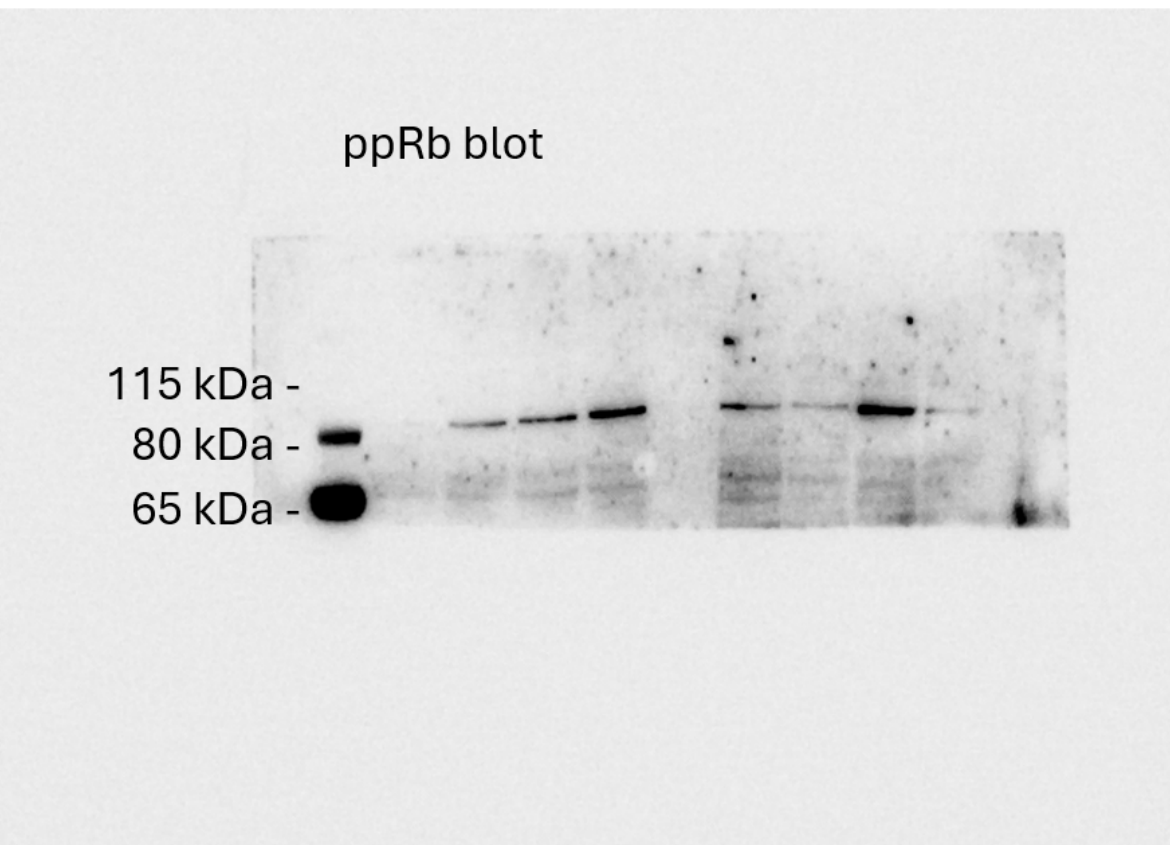

Ponceau Staining

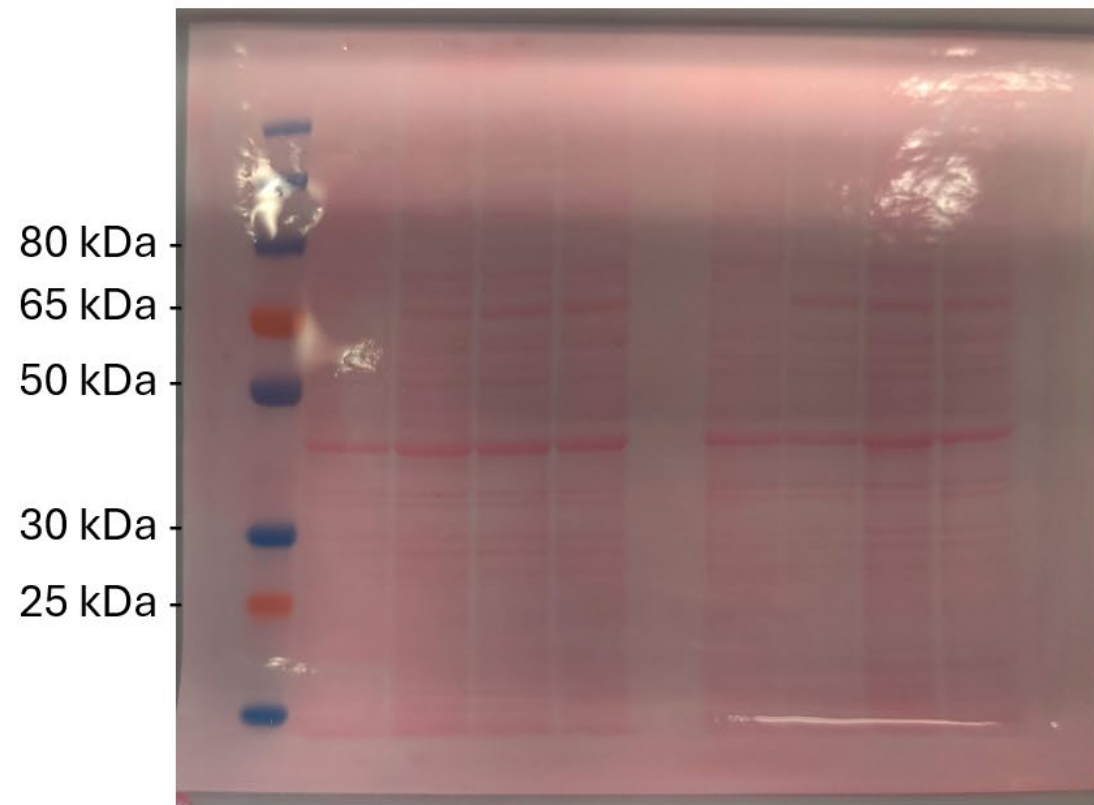

ACTB

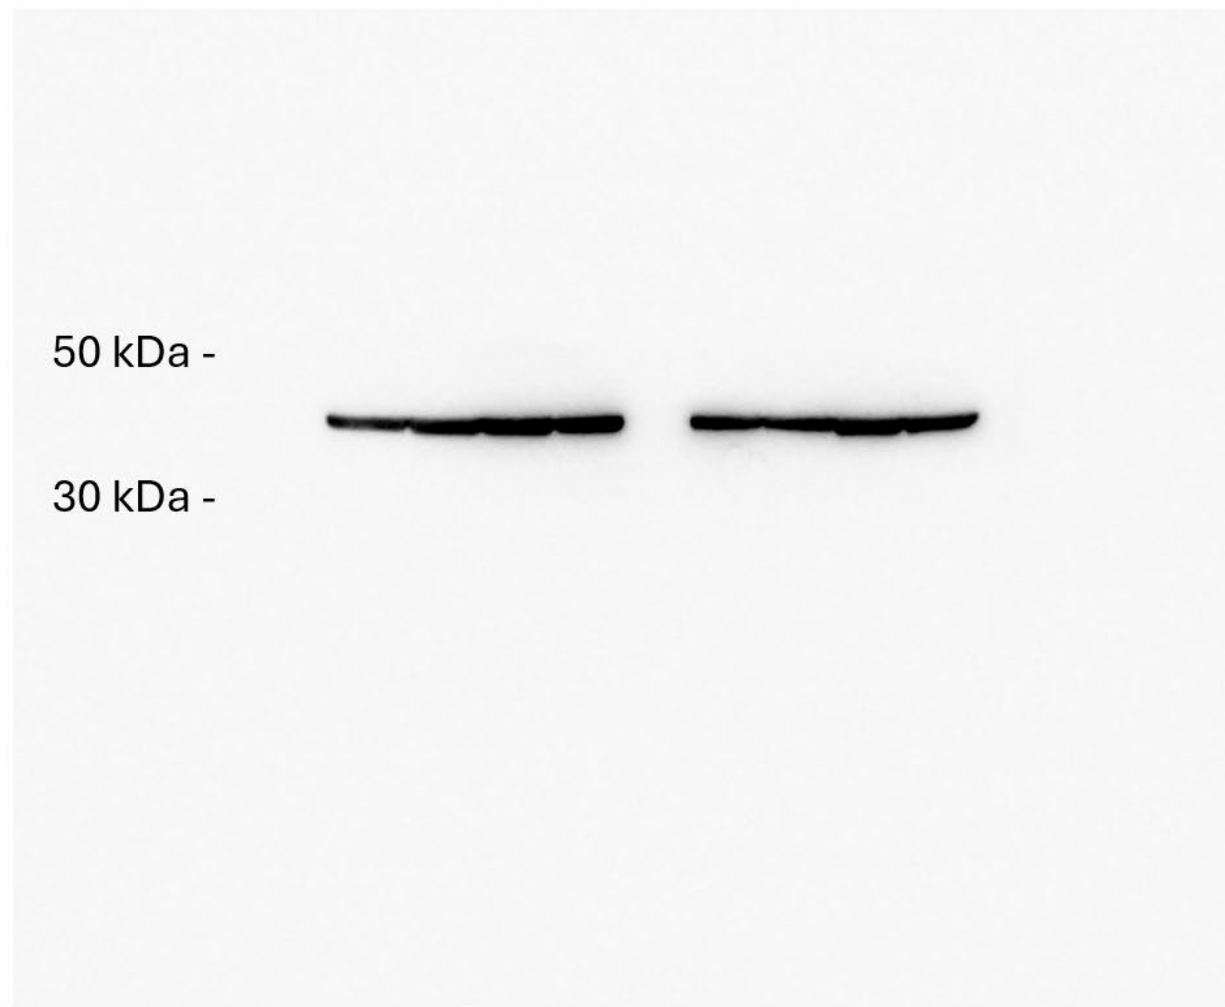

Supplement: 43587_2024_663_MOESM16_ESM.pdf [file 43587_2024_663_MOESM16_ESM.pdf]
